# Supplementary material
Source: Springer Nature journal article supplement (https://www.springermedizin.de/resource/supplementary/12887_2013_816_MOESM4_ESM.docx/9476294)
Supplement: MOESM4 [file 9476294]

| **Body weight**  **[kg]** | **Approx. total omega-3 daily dose [mg]** | **DHA daily dose**  **[mg]** | **EPA daily dose**  **[mg]** | **Dosage scheme** |
| --- | --- | --- | --- | --- |
| **Under 40** | 450 | 267 | 177,5 | Twice a day |
| **40-60** | 900 | 534 | 355 | Twice a day |
| **Over 60** | 1300 | 800 | 532,5 | Twice a day |

**Table 3. Dosage of omega-3 fatty acids.**
